# Supplementary material for: A strategy to improve the energy conversion efficiency and stability of quantum dot-sensitized solar cells using manganese-doped cadmium sulfide quantum dots
Source: Royal Society of Chemistry journal article supplement (doi:10.1039/c4dt03063j), 2014-11-10
Supplement: c4dt03063j1.pdf [file c4dt03063j1.pdf]

## **Supporting Information**

### **A strategy to improve energy conversion efficiency and stability in quantum dot-sensitized solar cells: Manganese-doped cadmium sulfide quantum dots**

Chandu V.V.M. Gopi, M.Venkata-Haritha, Soo-Kyoung Kim, Hee-Je Kim\*

*School of Electrical Engineering, Pusan National University, Gumjeong-Ku, Jangjeong-Dong,  
Busan 609-735, South Korea*

\*Corresponding authors. Tel.: +82 51 510 7334; fax: +82 51 513 0212.

E-mail addresses: [heeje@pusan.ac.kr](mailto:heeje@pusan.ac.kr) (H.-J. Kim).

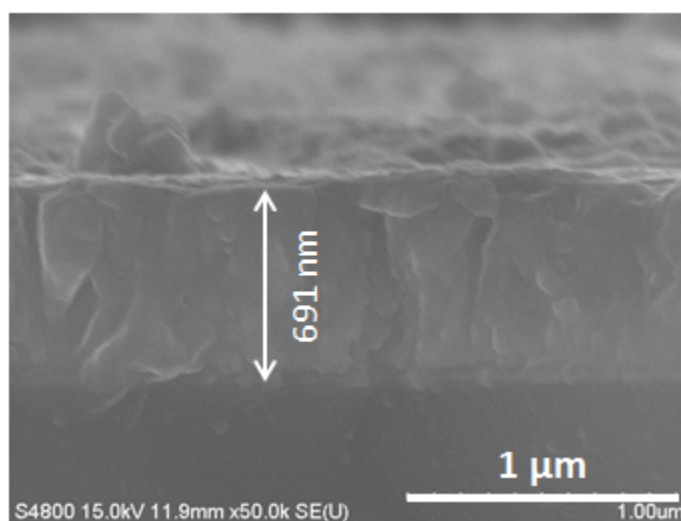

**Fig. S1. SEM cross-sectional thickness of CuS**

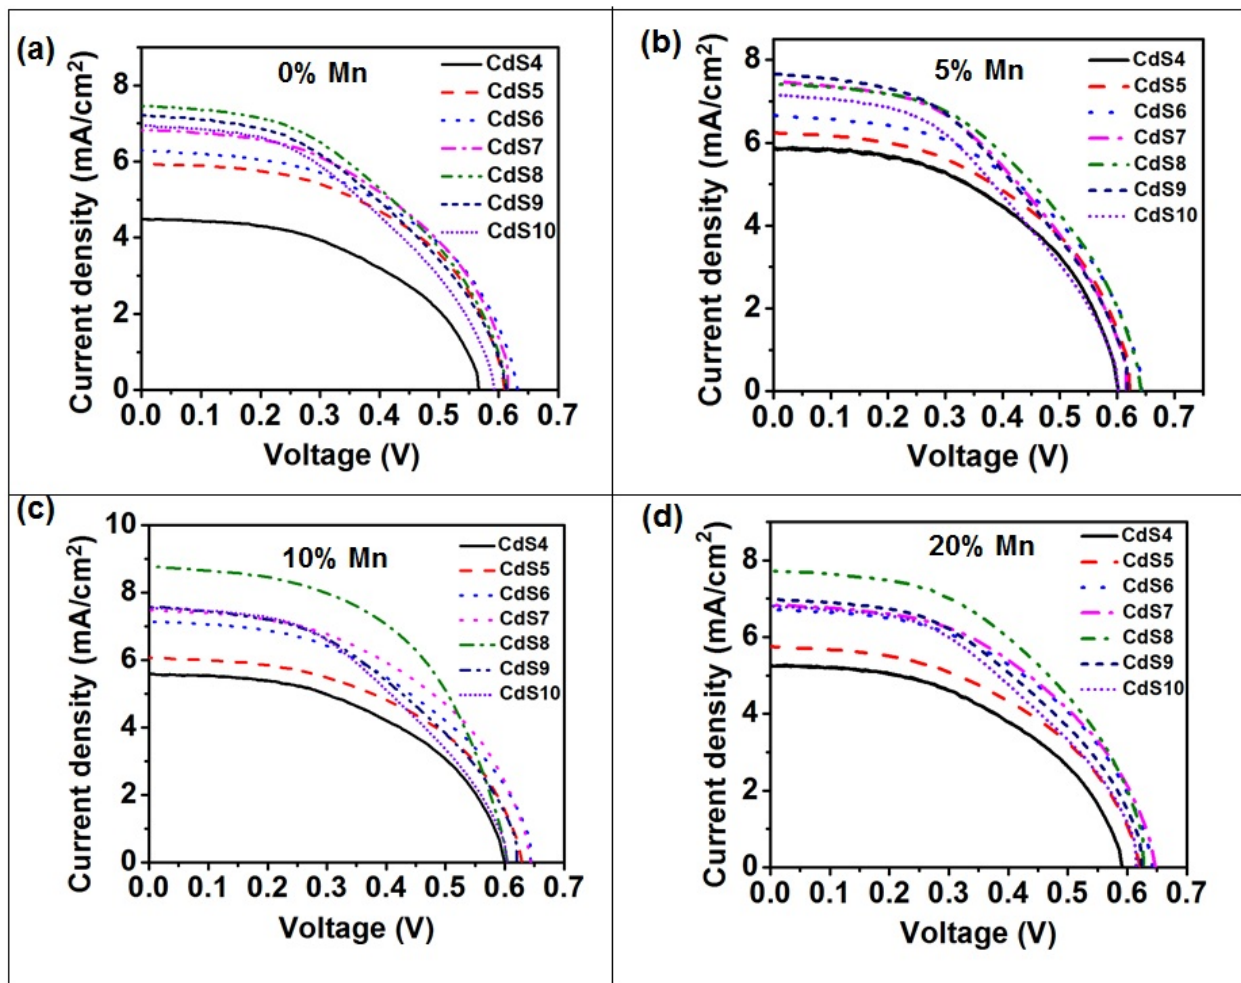

Fig. S2. Power conversion efficiency optimization using J-V curves based on (a) CdS, (b) 5% Mn-CdS, (c) 10% Mn-CdS, (d) 20% Mn-CdS QDSSC with CuS counter electrode and polysulfide electrolyte.
